# Supplementary material for: Endoplasmic Reticulum Protein Targeting of Phospholamban: A Common Role for an N-Terminal Di-Arginine Motif in ER Retention?
Source: PLoS One. 2010 Jul 9;5(7):e11496. doi: 10.1371/journal.pone.0011496 (PMC2901339; doi:10.1371/journal.pone.0011496)
Supplement: Table S2 — A table of percentage conservation of the di-arginine, di-lysine and XDEL motifs. Table showing the percentage of proteins identified in our bioinformatic screen that contain one or more transmembrane domains and retain the di-arginine or di-lysine motif or retain the XDEL motif and are lumenal proteins in a variety of species orthologues carried out using Basic Local Alignment Search Tool (BLAST). Numbers in brackets represent actual numbers. (0.02 MB XLS) [file pone.0011496.s002.xls]

## Sheet: Sheet1
Motif	Human	Macaque	Mouse	Rat	Bovine	Chimpanzee	Dog	Horse
RR	100% (91)	87.18% (68)	68.18% (60)	70.24% (59)	75.00% (54)	93.24% (69)	78.0% (57)	68.52% (37)
KK	100% (69)	85.25% (104)	87.05% (121)	76.39% (97)	77.39% (89)	83.00% (86)	80.53% (91)	75.46% (83)
XDEL	100% (31)	96.30% (26)	100% (31)	96.67% (29)	96.43% (27)	95.65% (22)	96.67% (29)	93.10% (27)
